# Supplementary material for: Establishment and validation of systemic inflammatory index model and risk assessment of PVT in cirrhosis after splenectomy—a retrospective study
Source: PeerJ. 2025 May 12;13:e19254. doi: 10.7717/peerj.19254 (PMC12080476; doi:10.7717/peerj.19254)
Supplement: Supplemental Information 1 [file peerj-13-19254-s001.xls]

## Sheet: Sheet1
outcome	Age（year）	Sex	BMI	Child-Pugh	HV	WBC（10^9/L）	neutrophile granulocyte（10^9/L）	lymphocyte（10^9/L）	monocyte（10^9/L）	blood platelet（10^9/L）	NLR	dNLR	LMR	PLR	SII	CAR	FAR	PCT（ng/mL）	IL-6（pg/mL）	APTT（s）	PT（s）	INR	FIB(g/L)	AT-III( %)	DII（μg/ml）	PSWBC	PS neutrophile granulocyte	PS lymphocyte	PS monocyte	PS PLT	PSNLR	PSdNLR	PSLMR	PSPLR	PSSII	operative approaches	Spleen thickness(cm)	Diameter of Portal Vein（mm）	Diameter of the splenic vein（mm）
0	57	0	2	0	1	3.14	2.08	0.78	0.24	64	2.66667	1.96226	3.25	82.0513	170.667	0.0345117	1.17188	0.03	6.33	41.2	14.7	1.17	2.34	104.3	0.17	7.89	5.89	1.3	0.64	72	4.53077	2.945	2.03125	55.3846	326.215	LS	50.71	14.46	10.69
1	33	1	1	0	0	1.83	1.13	0.51	0.17	47	2.21569	1.61429	3	92.1569	104.137	0.141448	1.82452	0.001	4.71	32.1	15.7	1.3	2.12	206	0.02	15.02	14.73	0.45	0.73	76	32.7333	50.7931	0.616438	168.889	2487.73	LS	79.24	22.03	17.07
1	67	0	2	0	1	2.29	1.36	0.72	0.15	109	1.88889	1.46237	4.8	151.389	205.889	0.0422558	0.728548	0.002	0	33.1	12.4	1.11	2.1	174.8	0.3	13.4	8.7	0.56	0.32	86	15.5357	1.85106	1.75	153.571	1336.07	LS	63.26	12.7	12.84
1	52	1	2	0	0	3.75	2.85	0.57	0.26	29	5	3.16667	2.19231	50.8772	145	0.0593103	1.31034	0.26	7.89	36.8	17.8	1.5	1.16	88.5	0.41	10.14	8.6	0.45	2.31	59	19.1111	5.58442	0.194805	131.111	1127.56	LS	60.46	19.51	12
1	46	1	2	0	0	9.38	8.18	0.59	0.58	49	13.8644	6.81667	1.01724	83.0508	679.356	0.019857	0.294396	0.17	12.2	46.1	14.2	1.12	4.19	239.3	0.37	14.78	13.49	0.8	0.49	84	16.8625	10.4574	1.63265	105	1416.45	LS	79.7	21.45	13.86
0	56	1	1	0	0	5.36	2.85	1.39	0.41	77	2.05036	1.13546	3.39024	55.3957	157.878	0.0425646	1.52016	0.57	13.44	35.2	12.9	0.99	2.43	200.9	0.03	10.32	6.72	0.43	0.54	84	15.6279	1.86667	0.796296	195.349	1312.74	LS	42.96	8.7	8.6
1	69	0	1	0	1	2.48	1.61	0.68	0.15	27	2.36765	1.85057	4.53333	39.7059	63.9265	0.111222	3.28502	0.05	2.92	33.5	14	1.09	3.07	380.9	2.9	8.14	7.11	0.41	0.51	52	17.3415	6.90291	0.803922	126.829	901.756	LS	43.92	13.02	10.38
0	54	0	2	0	0	3.07	1.66	0.97	0.24	62	1.71134	1.1773	4.04167	63.9175	106.103	0.0882161	2.82744	0.03	5.18	33.2	14.3	1.13	2.64	230	0.2	13	9.36	0.86	0.92	82	10.8837	2.57143	0.934783	95.3488	892.465	LS+PVD	55.55	15.95	13.37
0	51	0	2	0	1	3.16	2.54	0.32	0.27	56	7.9375	4.09677	1.18519	175	444.5	0.0307762	0.449944	0.02	3.05	31.6	13.7	1.23	2	203.6	4.96	17.1	13.68	0.71	0.15	80	19.2676	4	4.73333	112.676	1541.41	LS	62.19	17.07	13
1	62	1	1	0	0	1.3	0.81	0.26	0.14	26	3.11538	1.65306	1.85714	100	81	0.0892593	1.60494	0.25	21.15	41.2	16	1.3	2.02	187.9	3.31	7.36	7.23	0.34	0.5	89	21.2647	55.6154	0.68	261.765	1892.56	LS	72.42	14.85	11.28
0	50	0	1	0	1	6.54	4.66	1.25	0.53	45	3.728	2.47872	2.35849	36	167.76	0.045422	1.52003	0.062	7.89	44.2	13.8	1.08	3.55	318.4	0.02	9.69	7.62	1.13	0.89	68	6.74336	3.68116	1.26966	60.177	458.549	LS	59.32	14.49	9.84
1	56	0	2	0	0	1.94	0.5	0.81	0.61	43	0.617284	0.347222	1.32787	53.0864	26.5432	0.387293	9.98372	0.077	6.67	38.4	12.2	0.92	2.42	315.5	2.21	13.18	10.28	2.86	0.03	160	3.59441	3.54483	95.3333	55.9441	575.105	LS	49.98	14.97	13.87
1	52	0	1	0	1	1.87	0.87	0.19	0.31	34	4.57895	0.87	0.612903	178.947	155.684	0.0507437	1.7664	0.58	14.79	39.8	13	1.24	1.87	76	2.36	13	7.9	0.4	0.78	104	19.75	1.54902	0.512821	260	2054	LS	70.74	13.7	12.98
0	51	1	1	0	0	3.1	1.95	0.7	0.3	58	2.78571	1.69565	2.33333	82.8571	161.571	0.0663484	1.91866	0.04	2.43	40.3	12.9	1.16	1.9	238.2	0.63	14.07	10.72	0.54	0.01	54	19.8519	3.2	54	100	1072	LS	64.76	14.39	12.06
0	56	1	2	0	0	3.59	1.7	1.58	0.2	26	1.07595	0.899471	7.9	16.4557	27.9747	0.267385	8.04299	1.78	17.99	31.5	11.3	1.01	1.9	78	0.32	10.18	7.48	0.41	0.65	75	18.2439	2.77037	0.630769	182.927	1368.29	LS	57.23	16.1	10.26
0	57	0	1	0	0	2.15	1.37	0.42	0.26	26	3.2619	1.75641	1.61538	61.9048	84.8095	0.139489	2.1224	0.99	21.99	37.9	13.5	1.21	1.7	97	0.57	15.5	11.83	0.88	0.17	67	13.4432	3.22343	5.17647	76.1364	900.693	LS	48.35	13.18	13.76
1	53	0	1	0	1	4.64	3.72	0.56	0.25	44	6.64286	4.04348	2.24	78.5714	292.286	0.0328446	0.564516	1.44	89.44	38.2	14.6	1.31	3.8	360.4	3.14	11	9.6	0.56	0.25	44	17.1429	6.85714	2.24	78.5714	754.286	LS	52.69	12.47	12.71
1	52	0	2	0	0	5.37	4.18	0.58	0.53	42	7.2069	3.51261	1.09434	72.4138	302.69	0.0449305	0.660743	0.1	13.44	37.1	14.2	1.27	1.7	160.3	1.87	14.67	13.6	1.03	0.04	96	13.2039	12.7103	25.75	93.2039	1267.57	LS	54.35	15.56	10.48
1	58	0	2	0	0	2.77	1.9	0.55	0.29	75	3.45455	2.18391	1.89655	136.364	259.091	0.0242772	0.675439	0.04	1.86	38.6	12.7	1.09	1.89	140.7	1.14	7.56	6.29	0.4	0.36	94	15.725	4.95276	1.11111	235	1478.15	LS	43.1	12.33	9.36
1	43	0	2	0	0	2.1	1.5	0.49	0.1	43	3.06122	2.5	4.9	87.7551	131.633	0.053938	2.08915	0.022	2.42	38.4	14	1.1	2.02	108.5	0.15	14	7.1	0.34	0.73	57	20.8824	1.02899	0.465753	167.647	1190.29	LS	45.95	15.71	14.57
1	51	0	1	0	1	2.02	1.54	0.37	0.1	84	4.16216	3.20833	3.7	227.027	349.622	0.0247982	0.514842	0.044	2.43	38.4	14.6	1.15	2.18	103.6	0.87	9.83	8.67	0.56	0.31	92	15.4821	7.47414	1.80645	164.286	1424.36	LS	70.05	16.28	14.95
0	66	0	1	0	1	3.19	2.1	0.61	0.39	52	3.44262	1.92661	1.5641	85.2459	179.016	0.0274835	0.949634	0.17	16.54	40.1	15.6	1.26	4.28	164.7	1	6.23	4.92	0.96	0.31	130	5.125	3.75573	3.09677	135.417	666.25	LS	54.75	12.04	9.75
1	56	0	1	0	1	2.22	1.15	0.8	0.24	63	1.4375	1.07477	3.33333	78.75	90.5625	0.0982747	2.6501	0.02	6.01	38.9	14.7	14.7	3.04	254.1	0.15	15.89	8.9	0.54	0.54	59	16.4815	1.27325	1	109.259	972.407	LS+PVD	58.9	16.6	11.1
1	53	1	2	0	0	3.14	2.08	0.75	0.22	57	2.77333	1.96226	3.40909	76	158.08	0.0442181	1.48659	0.32	1.32	35.9	17.7	1.5	1.32	102.5	0.38	9.25	6.99	0.43	0.89	65	16.2558	3.09292	0.483146	151.163	1056.63	LS+PVD	75.5	15.97	12.63
1	47	1	1	0	0	2.29	1.54	0.44	0.23	48	3.5	2.05333	1.91304	109.091	168	0.0610714	2.08333	0.048	5.52	46.2	15.7	1.27	1.9	104.2	0.13	11.82	10.26	0.67	0.74	75	15.3134	6.57692	0.905405	111.94	1148.51	LS+PVD	64.77	17.69	13.23
1	37	1	2	0	0	3.26	2.43	0.63	0.19	52	3.85714	2.92771	3.31579	82.5397	200.571	0.0629202	1.49573	0.049	1.28	43.4	14.4	1.14	2.29	280.97	3.36	15.22	12.62	0.76	1.34	88	16.6053	4.85385	0.567164	115.789	1461.26	LS+PVD	51.11	19.6	14.1
0	65	0	1	0	0	2.48	1.93	0.44	0.09	64	4.38636	3.50909	4.88889	145.455	280.727	0.0221567	0.943977	0.02	2.27	37.1	14.4	1.14	3.02	105.62	0.2	10.14	6.22	0.37	0.56	74	16.8108	1.58673	0.660714	200	1244	LS+PVD	45.39	15.08	9.21
0	32	1	1	0	0	1.83	1.14	0.48	0.19	55	2.375	1.65217	2.52632	114.583	130.625	0.0799234	2.06699	0.05	7.72	26.7	15.4	1.3	1.78	108.3	0.17	14.5	10.44	0.38	0.4	60	27.4737	2.57143	0.95	157.895	1648.42	LS+PVD	48.08	16.43	12.53
1	66	0	2	0	0	4.81	3.51	0.87	0.26	42	4.03448	2.7	3.34615	48.2759	169.448	0.0418417	1.50488	0.05	8.69	43.6	20.7	1.7	1.45	79.8	0.14	16.9	7.09	0.44	1.03	69	16.1136	0.722732	0.427184	156.818	1111.84	LS	66.55	15.27	12.17
1	52	0	1	0	0	2.71	2.05	0.42	0.22	17	4.88095	3.10606	1.90909	40.4762	82.9762	0.0797819	2.53085	0.57	12.06	35.8	15.2	1.3	1.77	101.3	0.04	8.63	6.62	1.11	0.89	36	5.96396	3.29353	1.24719	32.4324	214.703	LS	49.32	15.78	10.13
0	48	1	2	0	0	2.64	1.8	0.58	0.22	51	3.10345	2.14286	2.63636	87.931	158.276	0.108734	2.17974	0.01	4.92	31.4	18.7	1.6	1.81	86.7	0.45	19.94	17.21	0.54	2.15	77	31.8704	6.30403	0.251163	142.593	2454.02	LS	68.61	18.23	14.52
0	43	1	1	0	0	3.09	1.66	1.01	0.32	80	1.64356	1.16084	3.15625	79.2079	131.485	0.0805414	1.48306	0.01	5	25.7	13.1	1.1	1.97	103.2	0.14	13.5	10.59	0.52	0.98	69	20.3654	3.63918	0.530612	132.692	1405.21	LS	47	14.45	11
0	46	1	2	0	1	3.08	1.67	0.96	0.3	62	1.73958	1.1844	3.2	64.5833	107.854	0.0391269	1.808	0.01	5.71	49.3	18.9	1.6	1.59	75.3	0.27	6.59	4.22	0.23	0.73	83	18.3478	1.78059	0.315068	360.87	1522.87	LS	62.27	18.52	13.46
0	37	1	0	0	0	3.05	2.1	0.54	0.26	66	3.88889	2.21053	2.07692	122.222	256.667	0.0625325	2.33766	0.01	0.9	41.7	15.4	1.24	1.83	246.4	0.21	21.4	16.05	0.78	1.64	61	20.5769	3	0.47561	78.2051	1255.19	LS+PVD	74.66	19.51	13.07
1	50	1	1	0	1	3.37	2.41	0.6	0.26	30	4.01667	2.51042	2.30769	50	120.5	0.0826556	2.6971	0.03	3.72	46.3	14.7	1.17	2.37	300.2	2.19	11.36	9.96	0.65	0.55	74	15.3231	7.11429	1.18182	113.846	1133.91	LS+PVD	56.18	17.26	10.09
1	45	1	2	0	0	1.54	0.79	0.54	0.2	58	1.46296	1.05333	2.7	107.407	84.8519	0.152383	3.18202	0.04	2.13	46	14.4	1.14	2.31	200.9	0.21	14.77	12.93	0.79	0.31	52	16.3671	7.02717	2.54839	65.8228	851.089	LS+PVD	51.34	15.98	12.01
1	55	1	1	0	0	3.26	2.6	0.34	0.27	30	7.64706	3.93939	1.25926	88.2353	229.412	0.062159	1.7	0.1	0.03	39.2	15.8	1.3	1.98	180.4	0.97	15.04	14.26	0.6	0.18	77	23.7667	18.2821	3.33333	128.333	1830.03	LS+PVD	64.78	17.77	12
1	47	1	1	0	0	3.42	2.52	0.39	0.44	37	6.46154	2.8	0.886364	94.8718	239.077	0.0409492	1.17117	0.12	79.35	42	16.1	1.32	4.7	198.3	2.44	10.82	9.79	0.54	0.35	117	18.1296	9.50485	1.54286	216.667	2121.17	LS	65.11	18.37	14.76
1	53	1	1	0	0	2.34	1.35	0.61	0.33	25	2.21311	1.36364	1.84848	40.9836	55.3279	0.0985037	3.88593	0.03	6.27	31.1	11.5	1.03	2.6	278	0.04	11.4	5.45	0.34	0.48	33	16.0294	0.915966	0.708333	97.0588	528.971	LS+PVD	43.37	16.05	9.71
1	46	1	1	0	1	2.62	2.03	0.38	0.19	24	5.34211	3.44068	2	63.1579	128.211	0.0517898	2.92488	0.141	54.45	39	16.2	1.32	2.19	240.7	2.38	7.85	6.64	0.41	0.83	44	16.1951	5.4876	0.493976	107.317	712.585	LS	62.15	17.8	15.83
0	46	1	1	0	1	2.92	2.01	0.53	0.33	51	3.79245	2.20879	1.60606	96.2264	193.415	0.0285397	1.91298	0.033	1.84	42.1	13.9	1.09	3.54	267	0.42	7.5	5.52	1.2	0.76	59	4.6	2.78788	1.57895	49.1667	271.4	LS+PVD	56.15	16.68	12.76
0	54	0	1	0	0	2.71	1.97	0.47	0.12	19	4.19149	2.66216	3.91667	40.4255	79.6383	0.0577612	3.64146	0.077	7.53	38	17.2	1.44	1.87	78	0.21	5.99	4.6	0.95	0.33	116	4.84211	3.30935	2.87879	122.105	561.684	LS	71.46	15.69	11.56
0	45	0	1	1	1	1.78	1.14	0.45	0.11	34	2.53333	1.78125	4.09091	75.5556	86.1333	0.147446	3.42492	0.06	8.76	39	18.77	1.67	2.23	101	0.54	16.5	12.7	0.85	0.22	135	14.9412	3.34211	3.86364	158.824	2017.06	LS	39.01	13.08	8.2
0	40	0	1	0	0	3.88	2.77	0.75	0.3	35	3.69333	2.4955	2.5	46.6667	129.267	0.084786	2.16606	0.05	7.98	35.4	12.5	1.07	2.27	99	0.35	14.5	10.96	0.53	0.06	111	20.6792	3.09605	8.83333	209.434	2295.4	LS	39.4	14.23	9.3
1	51	0	0	0	1	2	1.13	0.63	0.19	68	1.79365	1.29885	3.31579	107.937	121.968	0.0660828	2.66463	0.06	9.38	37.5	15	1.29	1.75	100.3	0.77	14.32	8.06	0.89	0.72	77	9.05618	1.28754	1.23611	86.5169	697.326	LS	70.56	12.79	10.63
0	62	0	1	0	1	2.37	1.46	0.74	0.12	38	1.97297	1.6044	6.16667	51.3514	74.973	0.0808291	3.80137	0.08	20.82	29.3	11	0.98	1.7	85	0.21	7.19	6.06	0.7	0.42	61	8.65714	5.36283	1.66667	87.1429	528.086	LS+PVD	45.58	14.78	8.7
0	51	1	2	0	0	4.12	2.6	1.05	0.37	45	2.47619	1.71053	2.83784	42.8571	111.429	0.0997051	1.83974	0.15	14.77	40.5	13.4	1.15	1.89	250.7	2.13	15.3	11.11	0.54	0.81	89	20.5741	2.65155	0.666667	164.815	1831.09	LS	54.81	16.71	11.54
0	60	0	1	0	0	2.26	1.59	0.38	0.23	40	4.18421	2.37313	1.65217	105.263	167.368	0.0517421	1.61321	0.09	24.57	31.6	13.3	1.19	2	255.8	0.04	11.2	8.66	1.37	1.09	110	6.32117	3.40945	1.25688	80.292	695.328	LS	67.86	14.49	9.88
1	51	1	2	0	0	3.56	2.22	0.88	0.31	39	2.52273	1.65672	2.83871	44.3182	98.3864	0.0672857	1.39247	0.24	8.54	35.7	13	1.16	1.7	147	1.16	9.37	6.62	0.33	1.01	90	20.0606	2.40727	0.326733	272.727	1805.45	LS	63.29	16.56	10.59
0	37	1	1	0	0	3.11	1.98	0.78	0.26	29	2.53846	1.75221	3	37.1795	73.6154	0.149018	3.49112	0.45	46.77	40.9	13.5	1.21	1.9	146	0.42	15.3	10.97	0.69	0.01	50	15.8986	2.53349	69	72.4638	794.928	LS+PVD	61.39	19.73	14.6
0	39	1	1	0	0	2.95	2.02	0.68	0.22	34	2.97059	2.17204	3.09091	50	101	0.0953465	2.9703	0.78	30.48	35.7	10.7	0.95	2.2	128	0.32	12.49	9.63	0.56	1.32	25	17.1964	3.36713	0.424242	44.6429	429.911	LS	56.19	17.02	10.98
0	46	1	1	0	0	3.04	1.95	0.86	0.2	29	2.26744	1.78899	4.3	33.7209	65.7558	0.114819	2.96552	0.04	4.93	40.3	13.6	1.22	1.2	103	0.44	11.3	7.55	0.46	0.48	54	16.413	2.01333	0.958333	117.391	886.304	LS	54.18	13.61	11.72
0	55	1	1	0	0	3.69	2.46	0.86	0.35	45	2.86047	2	2.45714	52.3256	128.721	0.0583433	1.70912	0.278	36.46	29.9	11	0.98	1.6	87	0.67	11.3	7.51	0.41	1.17	93	18.3171	1.98153	0.350427	226.829	1703.49	LS	43.58	12.58	9.26
0	60	0	1	0	1	3.49	2.55	0.64	0.21	18	3.98437	2.71277	3.04762	28.125	71.7188	0.140967	5.50763	0.208	42.69	42.4	14.4	1.29	2.1	198.7	1.56	14.3	10.11	0.6	1.52	76	16.85	2.41289	0.394737	126.667	1280.6	LS	53.26	12.73	12.75
1	58	0	2	0	1	1.21	0.75	0.34	0.11	48	2.20588	1.63043	3.09091	141.176	105.882	0.0551556	2.975	0.57	60.16	35.4	17.9	1.5	1.32	101.8	0.31	7.77	5.84	0.8	1.03	69	7.3	3.02591	0.776699	86.25	503.7	LS	62.45	16.94	13.61
0	56	0	2	0	0	4.28	2.75	1.18	0.31	52	2.33051	1.79739	3.80645	44.0678	121.186	0.037628	1.73287	0.01	5.35	43.9	14.4	1.29	2.2	236.8	1.14	6.78	4.56	1.67	0.47	52	2.73054	2.05405	3.55319	31.1377	141.988	LS	35.11	11.38	7.54
0	60	0	1	0	0	2.59	1.46	1	0.13	51	1.46	1.29204	7.69231	51	74.46	0.204942	3.08891	0.02	3.41	31.5	10.4	0.93	2	273	0.39	21.5	15.26	0.87	0.9	87	17.5402	2.44551	0.966667	100	1526	LS	52.68	16.37	10.86
0	47	1	2	0	1	1.69	1.43	0.15	0.09	65	9.53333	5.5	1.66667	433.333	619.667	0.0121517	0.298548	0.13	28.83	41.6	22.1	1.26	1.3	147	0.32	13.2	7.53	0.51	0.72	73	14.7647	1.32804	0.708333	143.137	1077.82	LS	69.08	16.23	14.33
0	66	0	1	0	3	3.25	2.41	0.52	0.22	44	4.63462	2.86905	2.36364	84.6154	203.923	0.032169	0.26971	0.19	34.09	28.8	12.1	1.04	2.3	247	0.42	8.54	6.56	0.18	0.06	66	36.4444	3.31313	3	366.667	2405.33	LS	56	14	8.6
0	62	0	1	0	0	2.83	2.29	0.37	0.14	50	6.18919	4.24074	2.64286	135.135	309.459	0.0470175	1.32489	0.37	21.99	35.1	12	1.03	1.64	278	0.12	18.64	14.55	0.94	1.55	59	15.4787	3.55746	0.606452	62.766	913.245	LS	50.11	15.78	11.4
0	57	0	1	0	1	2.25	1.34	0.68	0.18	40	1.97059	1.47253	3.77778	58.8235	78.8235	0.13841	3.93284	0.5	85.02	26	12	1.03	1.88	194	0.37	13.91	10.91	1.22	0.74	64	8.94262	3.63667	1.64865	52.459	572.328	LS	47.19	9.67	9.77
0	46	0	1	0	0	2.38	1.47	0.48	0.19	71	3.0625	1.61538	2.52632	147.917	217.438	0.0609371	1.74763	0.01	6.03	32.1	11.6	0.99	2.04	187	0.44	16.54	13.25	0.58	0.74	106	22.8448	4.02736	0.783784	182.759	2421.55	LS	49	14	10
0	45	0	0	0	0	3.31	2.41	0.51	0.36	52	4.72549	2.67778	1.41667	101.961	245.725	0.0432597	1.07844	0.05	30.48	39	11.3	1.01	1.7	156	0.87	13.2	10.63	0.41	1.12	128	25.9268	4.13619	0.366071	312.195	3318.63	LS	45.99	12	10.67
0	56	0	2	0	1	3.52	2.38	0.69	0.32	32	3.44928	2.08772	2.15625	46.3768	110.377	0.0762841	1.76668	0.77	73.33	30.8	14.6	1.26	2	248	0.41	10.6	8.42	0.86	0.22	61	9.7907	3.86239	3.90909	70.9302	597.233	LS	32.58	14	11
0	46	1	1	0	0	4.58	3.53	0.48	0.49	38	7.35417	3.3619	0.979592	79.1667	279.458	0.0488803	0.823021	0.04	5.12	27.5	11.4	0.87	1.67	213	0.61	17.13	13.66	0.32	1.35	122	42.6875	3.9366	0.237037	381.25	5207.88	LS	49	15.99	14.11
0	52	1	1	0	0	3.89	3.44	0.61	0.45	23	5.63934	7.64444	1.35556	37.7049	129.705	0.0599052	2.1202	0.137	39.92	29.4	17.4	1.15	1.54	218	0.21	10.14	7.77	0.42	0.74	51	18.5	3.27848	0.567568	121.429	943.5	LS	69	14.89	15.67
0	50	0	1	0	0	7.02	5.01	0.95	0.92	48	5.27368	2.49254	1.03261	50.5263	253.137	0.077863	0.987608	0.25	18.89	31.2	11.8	1.01	2.6	196	0.32	21.45	19.71	0.47	1.24	78	41.9362	11.3276	0.379032	165.957	3271.02	LS	69.11	16.77	14.11
0	54	1	1	0	0	3.18	2.46	0.41	0.22	55	6	3.41667	1.86364	134.146	330	0.0474545	1.5	0.04	4.68	37.4	12.4	1.06	2.3	220	0.15	18.44	15.66	0.94	1.77	71.9	16.6596	5.63309	0.531073	76.4894	1197.82	LS	47.65	18	13
0	52	1	1	0	0	1.54	0.93	0.33	0.21	40	2.81818	1.52459	1.57143	121.212	112.727	0.143532	4.43548	0.06	23.37	39.4	14.9	1.34	1.5	77	0.77	17.82	16.18	0.64	0.94	49	25.2812	9.86585	0.680851	76.5625	1238.78	LS	70	18	15
1	51	1	2	0	0	3.18	2.16	0.67	0.25	44	3.22388	2.11765	2.68	65.6716	141.851	0.0625305	3.41909	0.104	19.96	38.7	12.3	1.05	2.38	159.4	1.21	10.82	8.87	0.57	0.96	49	15.5614	4.54872	0.59375	85.9649	762.509	LS+PVD	64.3	14.11	13
1	54	0	2	0	1	5.26	3.89	0.89	0.44	74	4.37079	2.83942	2.02273	83.1461	323.438	0.0518492	0.751303	0.27	9.09	32.9	20.1	1.06	4.78	176	1.34	18.41	16.77	0.89	0.44	74	18.8427	10.2256	2.02273	83.1461	1394.36	LS	72.09	15	16.45
0	60	0	2	0	1	1.98	1.18	0.52	0.2	43	2.26923	1.475	2.6	82.6923	97.5769	0.0942846	2.71581	0.1	62.66	28.7	11.4	1.02	2.1	210	0.49	11.57	9.2	1.24	0.99	51	7.41935	3.88186	1.25253	41.129	378.387	LS	42.19	9.67	11
0	41	1	2	0	0	9.88	7.89	0.83	0.98	34	9.50602	3.96482	0.846939	40.9639	323.205	0.0158104	0.928204	0.57	52.01	37.3	13.2	1.18	1.7	254	0.12	7.12	5.11	0.33	1	51	15.4848	2.54229	0.33	154.545	789.727	LS	55	18	13.1
0	47	1	2	0	1	2.25	1.43	0.65	0.35	50	2.2	1.7439	1.85714	76.9231	110	0.0894545	4	0.39	53.82	26.3	14.1	1.21	1.4	234	0.01	10.75	9.84	0.64	0.09	52	15.375	10.8132	7.11111	81.25	799.5	LS+PVD	54.19	12.78	13.44
0	59	0	1	0	0	2.73	1.54	0.71	0.22	25	2.16901	1.29412	3.22727	35.2113	54.2254	0.0769013	4.88701	0.01	1.79	34.7	14.7	1.27	1.2	277	0.43	6.55	4.17	1.59	0.54	33	2.62264	1.7521	2.94444	20.7547	86.5472	LS	52.99	13.57	12.56
0	66	0	1	0	1	8.54	6.9	0.7	0.69	50	9.85714	4.20732	1.01449	71.4286	492.857	0.0224812	0.304348	0.03	2.57	37.8	16.8	1.46	1.32	254	0.37	13.64	11.08	0.7	1.64	75	15.8286	4.32812	0.426829	107.143	1187.14	LS	47	17	7.54
0	31	1	0	0	0	1.9	1.15	0.57	0.12	28	2.01754	1.53333	4.75	49.1228	56.4912	0.21313	8.85093	0.06	12.76	39.3	15.1	1.3	1.36	103	0.77	14.76	12.04	1.17	1.54	57	10.2906	4.42647	0.75974	48.7179	586.564	LS+PVD	49.66	19	9.56
0	46	0	1	0	1	2.23	1.46	0.6	0.16	50	2.43333	1.8961	3.75	83.3333	121.667	0.0961644	2.17808	0.187	36.46	33.3	12.6	1.08	2	234	0.24	15.9	11.7	0.67	0.78	88	17.4627	2.78571	0.858974	131.343	1536.72	LS	58	15	11
0	61	0	2	0	3	2.32	1.43	0.58	0.17	33	2.46552	1.60674	3.41176	56.8966	81.3621	0.062437	3.50286	0.97	87.59	35.1	13.3	1.19	1.5	314	0.29	6.54	5.08	0.87	0.47	48	5.83908	3.47945	1.85106	55.1724	280.276	LS	74.58	19	16.17
0	45	1	2	0	0	3.67	2.22	0.8	0.56	61	2.775	1.53103	1.42857	76.25	169.275	0.0838281	1.91995	0.137	52.01	47.8	14	1.21	2.2	335	0.31	15.46	14.19	0.96	0.29	50	14.7812	11.1732	3.31034	52.0833	739.062	LS	65.99	17	15.11
0	49	0	1	0	1	5.79	4.52	0.65	0.38	57	6.95385	3.55906	1.71053	87.6923	396.369	0.0394329	1.22361	0.01	3.14	33.8	14.2	1.22	2.26	108	0.47	17.64	15.63	1.17	1.09	119	13.359	7.77612	1.07339	101.709	1589.72	LS	62.11	16	12.78
0	56	0	1	0	0	1.62	1.05	0.43	0.1	60	2.44186	1.84211	4.3	139.535	146.512	0.0371984	1.29683	0.05	19.25	37.8	18.5	1.5	1.34	102.3	0.42	6.66	5.45	0.61	0.51	61	8.93443	4.50413	1.19608	100	545	LS	58.4	13	9
0	43	1	1	0	0	2.59	1.69	0.53	0.31	49	3.18868	1.87778	1.70968	92.4528	156.245	0.031937	1.69605	0.14	4.8	31.3	15.2	1.3	1.87	102.5	0.58	6.67	4.99	0.31	0.41	85	16.0968	2.97024	0.756098	274.194	1368.23	LS	67	14	10
1	51	0	1	1	1	2.64	1.92	0.59	0.09	26	3.25424	2.66667	6.55556	44.0678	84.6102	0.0881691	2.65925	0.17	147	43.9	16.4	1.35	2.3	200.1	0.1	9.72	7.46	0.79	0.4	46	9.44304	3.30088	1.975	58.2278	434.38	LS	69.48	18.4	15.9
0	54	1	1	0	1	11.5	9.9	0.84	0.64	32	11.7857	6.1875	1.3125	38.0952	377.143	0.0187197	0.755682	0.04	10.4	34	12.6	1.15	2.34	247	0.2	8.93	7.06	0.33	0.08	74	21.3939	3.7754	4.125	224.242	1583.15	LS	48	13	10
0	52	1	1	0	0	4.67	4.08	0.27	0.25	50	15.1111	6.91525	1.08	185.185	755.556	0.00618088	0.476471	0.01	3.7	35	14.2	1.12	3.83	211	0.13	10.63	4.67	0.31	0.13	103	15.0645	0.783557	2.38462	332.258	1551.65	LS+PVD	52	12.6	9.78
1	46	1	1	1	0	4.74	3.34	0.34	0.57	35	9.82353	2.38571	0.596491	102.941	343.824	0.032982	1.12849	0.04	12.8	37	15.89	1.15	3.87	89	0.51	12.93	11.34	0.78	1.34	89	14.5385	7.13208	0.58209	114.103	1293.92	LS+PVD	81.45	20.67	23.4
0	35	1	1	0	0	5.08	3.25	1.23	0.56	36	2.64228	1.77596	2.19643	29.2683	95.122	0.0699103	4.73077	0.02	11.5	37.1	12.4	1.11	2.7	229.1	0.01	9.94	6.65	0.42	0.05	102	15.8333	2.02128	8.4	242.857	1615	LS	45.6	11.6	9.3
0	50	0	1	1	0	2.23	1.52	0.55	0.13	57	2.76364	2.14085	4.23077	103.636	157.527	0.0749711	2.38054	0.16	37	37.1	11.7	1.05	1.9	149	0.57	12.43	11.81	0.34	0.29	78	34.7353	19.0484	1.17241	229.412	2709.35	LS	42.3	12	11.3
0	61	1	1	0	2	4.61	2.59	1.5	0.38	65	1.72667	1.28218	3.94737	43.3333	112.233	0.0608554	1.4256	0.045	5.5	29.9	11.3	1.01	2.4	234	0.13	9.25	6.83	0.32	0.85	68	21.3438	2.82231	0.376471	212.5	1451.38	LS	54.78	16	13.6
0	55	0	2	0	0	2.03	0.83	0.97	0.17	59	0.85567	0.691667	5.70588	60.8247	50.4845	0.113698	4.35777	0.034	7.7	29.5	11.9	1.06	2	215	0.17	7.47	5.74	1.26	5.6	66	4.55556	3.31792	0.225	52.381	300.667	LS	47.6	13.5	11
0	59	0	1	0	1	1.21	0.72	0.38	0.07	29	1.89474	1.46939	5.42857	76.3158	54.9474	0.161791	6.91571	0.01	3.4	39.5	15.5	1.39	1.8	267	0.37	9.95	8.89	0.32	0.37	83	27.7812	8.38679	0.864865	259.375	2305.84	LS+PVD	55	18	14
0	47	1	2	0	2	3.77	2.08	1.03	0.33	72	2.01942	1.23077	3.12121	69.9029	145.398	0.0599045	2.23524	0.01	5.5	34.1	14.1	1.21	2.22	313	0.57	10.86	8.71	0.45	0.9	92	19.3556	4.05116	0.5	204.444	1780.71	LS	58	12	11.3
0	53	1	1	0	2	5.48	3.17	1.52	0.64	46	2.08553	1.37229	2.375	30.2632	95.9342	0.153022	4.58648	0.19	23.8	36.2	14.6	1.26	1.64	180	0.86	18.47	14.68	0.67	1.68	76	21.9104	3.87335	0.39881	113.433	1665.19	LS	37.8	13.3	12.6
0	32	1	2	0	0	3.84	2.05	1.28	0.33	61	1.60156	1.14525	3.87879	47.6562	97.6953	0.126209	3.37785	0.01	24.9	46.1	14.3	1.23	2	184.4	0.19	15.87	12.33	0.77	1.9	99	16.013	3.48305	0.405263	128.571	1585.29	LS	56.1	12.9	10.6
0	52	0	1	0	2	5.68	4.63	0.7	0.24	53	6.61429	4.40952	2.91667	75.7143	350.557	0.0439586	0.827255	0.04	56.1	30.1	12.9	1.11	1.82	145.9	0.21	17.24	15.41	0.14	1.59	106	110.071	8.42077	0.0880503	757.143	11667.6	LS	43.8	10.2	9.4
0	37	1	2	0	0	3.99	2.75	0.88	0.18	69	3.125	2.21774	4.88889	78.4091	215.625	0.0492522	1.27536	0.01	44	28.8	16.2	1.4	1.42	201.8	0.46	13.28	10.62	0.55	0.62	88	19.3091	3.99248	0.887097	160	1699.2	LS	66.1	17.96	14.6
0	33	1	2	0	0	5.22	3.59	1.1	0.35	78	3.26364	2.20245	3.14286	70.9091	254.564	0.0475323	1.92486	0.039	0.47	33.2	12	1.03	2.28	287.5	0.37	15.59	12.1	0.76	0.98	93	15.9211	3.46705	0.77551	122.368	1480.66	LS	54.8	15.3	13.7
0	44	1	1	0	2	5.55	2.38	1.78	1.17	16	1.33708	0.750789	1.52137	8.98876	21.3933	0.330478	13.5557	0.14	1.44	30.4	13.1	1.02	1.48	213.2	0.44	9.55	7.07	0.43	1.31	62	16.4419	2.85081	0.328244	144.186	1019.4	LS	64.9	16.5	14.3
0	52	1	1	0	0	3.56	2.27	0.23	1.17	34	9.86957	1.75969	0.196581	147.826	335.565	0.0366546	1.07282	0.2	5.17	33	13.3	1.19	1.2	167.9	0.89	14.13	12.3	0.23	1.17	116	53.4783	6.72131	0.196581	504.348	6203.48	LS	75.8	16	13.4
0	62	1	0	0	2	3.21	1.59	1.2	0.34	75	1.325	0.981481	3.52941	62.5	99.375	0.0684277	3.32075	0.21	5.5	37.8	11.9	1.02	3	141	0.57	8.95	6.8	1.69	0.32	67	4.02367	3.16279	5.28125	39.645	269.586	LS+PVD	46.8	11.5	10.2
1	31	0	2	0	0	1.38	1	0.28	0.09	20	3.57143	2.63158	3.11111	71.4286	71.4286	0.1736	2.87	0.05	0.79	37.9	14.63	1.2	1.39	105.2	0.3	14.39	12.4	0.75	0.6	87	16.5333	6.23116	1.25	116	1438.4	OS	82.69	21.19	22.35
0	62	0	1	0	0	6.95	3.34	3.04	0.26	161	1.09868	0.925208	11.6923	52.9605	176.888	0.0797679	1.18719	0.04	1.62	30.4	13.27	1.1	2.68	105.8	0.39	16	14.11	0.74	0.75	136	19.0676	7.46561	0.986667	183.784	2593.19	OS	36.71	12.02	8.45
1	55	0	1	0	0	0.96	0.67	0.19	0.09	32	3.52632	2.31034	2.11111	168.421	112.842	0.0703638	2.88013	0.02	1.17	33.9	19.3	1.6	1.76	104.2	0.65	12.43	7.94	0.41	0.23	78	19.3659	1.76837	1.78261	190.244	1510.54	OS+PVD	67.16	25.07	15.78
1	56	0	1	0	0	1.68	1.06	0.38	0.2	83	2.78947	1.70968	1.9	218.421	231.526	0.0245328	0.950216	0.09	3.11	25.2	15	1.3	1.9	78.6	3.81	6.77	5.68	0.87	0.97	103	6.52874	5.21101	0.896907	118.391	672.46	OS	92.78	20.95	17.28
0	46	1	1	0	0	3.14	2.34	0.52	0.25	82	4.5	2.925	2.08	157.692	369	0.0373984	0.677507	0.56	83.59	41.2	15.7	1.27	1.93	125.8	0.17	16.41	13.8	0.67	1.31	84	20.597	5.28736	0.51145	125.373	1730.15	OS+PVD	64.05	16.58	14.95
0	58	1	1	1	0	1.97	1.48	0.4	0.06	38	3.7	3.02041	6.66667	95	140.6	0.0565434	1.67141	0.022	0.72	38.2	18.3	1.25	2.37	234.1	0.41	9.39	7.95	0.51	0.59	37	15.5882	5.52083	0.864407	72.549	576.765	OS+PVD	74.21	19.15	13.08
0	49	1	2	0	0	2.61	1.43	0.89	0.22	42	1.60674	1.21186	4.04545	47.191	67.4831	0.159003	4.001	0.55	41.05	43.4	16	1.44	1.3	123.2	0.19	12.57	10.73	0.47	1.34	37	22.8298	5.83152	0.350746	78.7234	844.702	OS	81.36	15.56	7.44
0	53	0	2	1	1	3.78	1.34	0.78	0.34	56	1.71795	0.54918	2.29412	71.7949	96.2051	0.105296	4.83342	0.007	3.38	27.9	19	1.34	1.68	56	0.94	13.5	10.13	0.58	0.74	78	17.4655	3.00593	0.783784	134.483	1362.31	OS+PVD	58.87	15.27	10.37
0	54	0	1	0	1	0.94	0.65	0.21	0.07	36	3.09524	2.24138	3	171.429	111.429	0.10159	1.70513	0.004	6.55	27.2	16.8	1.4	1.61	89.3	0.71	12.62	11.32	0.58	0.69	109	19.5172	8.70769	0.84058	187.931	2127.38	OS	83.77	15.33	16.61
0	63	1	1	0	0	4.91	2.42	1.91	0.48	140	1.26702	0.971888	3.97917	73.2984	177.382	0.0658465	0.676505	0.05	0.87	27.4	12.5	1	3.2	90.6	0.72	15.63	11.68	3.78	0.14	159	3.08995	2.95696	27	42.0635	491.302	OS	67.36	14.79	10.35
0	40	1	1	0	0	8.17	2.76	0.99	0.31	109	2.78788	0.510166	3.19355	110.101	303.879	0.0207978	0.592341	0.09	5.5	31.5	12.8	1.1	2.8	103.6	0.33	11.9	6.32	0.41	0.51	113	15.4146	1.13262	0.803922	275.61	1741.85	OS	85.57	20.2	16.36
0	50	0	2	0	1	1.57	1	0.43	0.12	52	2.32558	1.75439	3.58333	120.93	120.93	0.111221	2.24923	0.1	31.31	35.5	15	1.2	1.91	328	0.22	15.59	13.45	0.58	1.53	63	23.1897	6.28505	0.379085	108.621	1460.95	OS+PVD	58.6	17.2	12.87
1	57	0	1	0	0	2.54	1.71	0.47	0.33	50	3.6383	2.06024	1.42424	106.383	181.915	0.0651953	1.95146	0.06	5.49	35.7	11.8	1.05	1.8	78.3	0.75	13.3	11.86	0.33	1.1	104	35.9394	8.23611	0.3	315.152	3737.7	OS+PVD	87.1	14.15	15.75
0	61	1	1	0	0	4.78	1.67	0.53	0.44	31	3.15094	0.536977	1.20455	58.4906	97.6792	0.0488333	2.25227	1.57	3.44	44	17.9	1.77	1.9	180.5	0.67	11.7	4.77	0.04	0.07	68	119.25	0.688312	0.571429	1700	8109	OS	77.3	18.9	15.73
0	44	1	1	1	0	0.96	0.45	0.15	0.04	31	3	0.882353	3.75	206.667	93	0.072043	4.30108	1.57	2.79	38.7	15.4	1.23	1.44	219.4	0.81	12.45	6.7	0.16	0.14	77	41.875	1.16522	1.14286	481.25	3224.38	LS	64.19	14.12	10.48
1	41	1	2	0	0	1.6	1.1	0.41	0.07	41	2.68293	2.2	5.85714	100	110	0.0594545	1.77273	0.08	4.83	42.5	14.1	1.26	1.6	320.1	2.78	8.17	6.54	0.32	0.68	88	20.4375	4.01227	0.470588	275	1798.5	OS	77.25	17.52	10.03
1	25	1	2	0	0	0.88	1.13	0.28	0.08	27	4.03571	-4.52	3.5	96.4286	108.964	0.099941	2.15667	0.069	11.23	39.9	19	1.62	1.33	177.3	1.01	12.52	10.89	0.7	0.86	80	15.5571	6.68098	0.813953	114.286	1244.57	OS	81.34	17.78	12.31
0	62	0	1	0	1	3.01	2.24	0.41	0.35	77	5.46341	2.90909	1.17143	187.805	420.683	0.0290242	0.760668	0.083	15.99	41.4	13.4	1.04	4.97	259.7	1.78	15.59	12.21	2.01	1.36	47	6.07463	3.61243	1.47794	23.3831	285.507	LS	75.51	13.05	8.4
1	53	1	2	0	0	2.01	1.36	0.46	0.17	30	2.95652	2.09231	2.70588	65.2174	88.6957	0.0941422	2.66078	0.1	20.24	44.3	19	1.31	1.89	379.6	3.31	9.62	8.35	0.54	0.64	49	15.463	6.5748	0.84375	90.7407	757.685	OS	72.15	17.01	11.91
0	36	1	1	0	0	3.09	2.3	0.51	0.2	48	4.5098	2.91139	2.55	94.1176	216.471	0.00725272	0.785326	0.098	13.99	44.5	15.7	1.27	2.39	288.9	0.03	2.36	1.57	0.09	0.18	55	17.4444	1.98734	0.5	611.111	959.444	OS	58.9	16.76	9.01
1	32	0	1	0	0	2.61	1.82	0.6	0.17	40	3.03333	2.3038	3.52941	66.6667	121.333	0.0825	2.63736	0.11	8.49	33.1	12.5	1.12	1.8	290.4	6.25	11.06	10.01	1.02	0.03	76	9.81373	9.53333	34	74.5098	745.843	OS	71.38	13.95	11.03
1	68	0	1	0	1	4.7	2.6	0.76	0.68	31	3.42105	1.2381	1.11765	40.7895	106.053	0.128238	2.54591	0.047	7.9	32.44	11.9	1.15	2.4	180.4	2.17	15	13.6	0.7	0.05	98	19.4286	9.71429	14	140	1904	OS+PVD	59.58	26.62	19.59
0	29	1	1	0	0	1.67	0.95	0.67	0.01	26	1.41791	1.31944	67	38.806	36.8657	0.132644	4.74696	0.04	2.86	37	12.9	1.16	1.7	238	10.94	7.58	4.89	0.31	1.04	74	15.7742	1.81784	0.298077	238.71	1167.29	OS	62.08	15.65	10.05
0	62	0	2	1	0	6.77	4.13	1.7	0.77	66	2.42941	1.56439	2.20779	38.8235	160.341	0.0367342	1.18497	1.33	0.76	34.5	12/78	1.45	3.33	280.7	0.14	12.47	5.89	0.13	1.26	89	45.3077	0.895137	0.103175	684.615	4032.38	OS	68.29	18.82	12.24
0	40	1	1	0	0	2.18	1.37	0.73	0.01	43	1.87671	1.69136	73	58.9041	80.6986	0.112146	3.53166	0.6	62.11	33.7	13.4	1.15	1.96	77	1.67	11.36	9.05	2.04	0.22	92	4.43627	3.91775	9.27273	45.098	408.137	OS+PVD	74.08	14.51	10.55
1	52	0	2	0	1	1.6	1.03	0.46	0.09	52	2.23913	1.80702	5.11111	113.043	116.435	0.0777259	2.53361	0.11	197.13	35.9	13.5	1.21	1.9	232.9	3.48	10.14	9.05	0.54	1.51	103	16.7593	8.30275	0.357616	190.741	1726.2	OS	59.07	16.81	15.17
0	38	1	1	0	1	3.75	0.96	2.05	0.71	73	0.468293	0.344086	2.88732	35.6098	34.1854	0.151527	4.5341	0.355	65.99	39.5	15.6	1.19	3.3	211.1	0.39	8.47	5.18	0.32	2.53	116	16.1875	1.57447	0.126482	362.5	1877.75	OS	82.39	15.65	14.22
1	70	1	2	0	0	5.25	3.43	1.24	0.54	131	2.76613	1.88462	2.2963	105.645	362.363	0.0208355	0.482941	1.77	61.6	33.4	11.7	1	2.92	261.4	0.57	9.73	7.55	0.34	0.88	162	22.2059	3.4633	0.386364	476.471	3597.35	OS	28.34	17.24	10.5
1	29	1	1	0	0	0.66	0.32	0.22	0.05	14	1.45455	0.941176	4.4	63.6364	20.3636	0.5775	10.8036	0.12	22.51	41.7	14.6	1.31	1.6	273.1	2.44	12.38	11.76	0.43	0.17	30	27.3488	18.9677	2.52941	69.7674	820.465	OS+PVD	70.23	17.32	15.91
1	31	1	2	0	0	1.35	0.51	0.75	0.07	56	0.68	0.607143	10.7143	74.6667	38.08	0.287553	5.3834	0.56	38.78	50.1	12.6	1.13	1.2	390.7	5.55	13.76	10.95	0.67	0.52	67	16.3433	3.8968	1.28846	100	1095	OS	96.49	19.8	15.3
1	51	0	1	0	0	2.53	1.71	0.65	0.14	52	2.63077	2.08537	4.64286	80	136.8	0.0704678	1.31579	0.17	26.77	35.9	12.4	1.11	2.2	140.3	0.69	10.28	9.64	0.34	0.27	66	28.3529	15.0625	1.25926	194.118	1871.29	OS	58.27	18.12	12.37
0	48	0	1	0	1	1.33	0.55	0.61	0.14	27	0.901639	0.705128	4.35714	44.2623	24.3443	0.407899	7.80471	0.01	4.52	29.3	13.2	1.18	1.4	44	1.78	11.95	9.93	0.91	1.09	51	10.9121	4.91584	0.834862	56.044	556.516	OS	45.24	12.39	10.52
1	49	0	1	0	3	1.34	0.77	0.32	0.08	32	2.40625	1.35088	4	100	77	0.0707792	3.63636	0.03	5.67	34.7	13.2	1.18	1.6	117.6	0.77	14.23	5.45	0.23	0.94	47	23.6957	0.620729	0.244681	204.348	1113.7	OS	60.31	14.95	11.81
1	64	0	1	0	0	1.82	0.97	0.68	0.15	40	1.42647	1.14118	4.53333	58.8235	57.0588	0.161062	5.08247	0.01	6.56	31.4	14.4	1.29	1.5	179.9	0.69	10.22	9.19	0.68	0.34	44	13.5147	8.92233	2	64.7059	594.647	OS	56.91	15.17	10.64
0	30	0	1	0	0	2.86	2.19	0.44	0.14	37	4.97727	3.26866	3.14286	84.0909	184.159	0.0528348	0.776503	0.01	3.89	41	13.2	1.13	1.66	349.7	0.11	10.55	9.73	0.22	0.6	49	44.2273	11.8659	0.366667	222.727	2167.14	OS	57.51	11.64	9.04
0	69	1	1	0	2	2.65	1.78	0.48	0.25	50	3.70833	2.04598	1.92	104.167	185.417	0.0394247	2.1573	0.02	4.05	28.4	15.5	1.34	2.86	260.5	0.1	8.59	7.31	0.64	0.64	90	11.4219	5.71094	1	140.625	1027.97	OS+PVD	32.59	7.96	7.32
0	35	1	1	0	0	2.66	1.46	0.87	0.19	34	1.67816	1.21667	4.57895	39.0805	57.0575	0.10025	3.06708	0.109	15.64	37.1	14.1	1.21	1.89	147	1.99	8.93	5.72	2.31	0.79	95	2.47619	1.78193	2.92405	41.1255	235.238	OS	44	11	10.34
0	52	1	2	1	1	4.02	1.77	1.61	0.49	40	1.09938	0.786667	3.28571	24.8447	43.9752	0.159181	4.32062	0.051	11.44	32.3	13.8	1.19	1.32	241.4	0.15	10.61	7	0.43	1.17	72	16.2791	1.93906	0.367521	167.442	1172.09	OS	56.88	12	11
0	44	0	1	0	1	1.73	1.15	0.33	0.21	71	3.48485	1.98276	1.57143	215.152	247.424	0.0214611	0.666871	0.057	10.39	37.7	13.1	1.12	1.34	159.7	0.17	6.38	5.31	0.57	0.46	116	9.31579	4.96262	1.23913	203.509	1080.63	OS	36.97	7.99	6.99
0	56	1	2	0	0	1.25	0.69	0.4	0.12	31	1.725	1.23214	3.33333	77.5	53.475	0.167555	3.45956	0.987	24.11	36.4	15.7	1.36	1.44	100.3	0.22	10.36	8.96	1	0.31	85	8.96	6.4	3.22581	85	761.6	OS	45.98	10.36	11.12
0	45	1	1	1	0	2.49	1.83	0.4	0.18	40	4.575	2.77273	2.22222	100	183	0.027541	0.355191	0.03	3.58	36.5	23.9	2.28	1.28	230	0.04	6.08	5.04	0.32	0.33	35	15.75	4.84615	0.969697	109.375	551.25	OS	72.11	17.59	15.76
0	61	1	1	0	1	2.6	1.12	1.2	0.24	54	0.933333	0.756757	5	45	50.4	0.119444	1.5873	0.11	21.23	38	12.1	1.04	2	196.8	0.14	8.66	6.02	0.31	0.37	97	19.4194	2.2803	0.837838	312.903	1883.68	OS	56.11	14.15	12.46
0	46	1	1	0	0	2.57	1.8	0.48	0.17	25	3.75	2.33766	2.82353	52.0833	93.75	0.07552	1.17333	0.441	31.38	42.2	13.7	1.18	1.92	180.7	0.16	8.88	7.08	0.79	0.93	78	8.96203	3.93333	0.849462	98.7342	699.038	OS	47.97	15.96	11.34
0	49	1	1	0	0	1.9	0.9	0.79	0.16	50	1.13924	0.9	4.9375	63.2911	56.962	0.185211	2.28222	0.023	4.14	36.9	12.1	1.04	2.03	112	1.59	12.18	10.55	0.82	0.82	97	12.8659	6.47239	1	118.293	1247.99	OS	57.89	17.98	15.67
0	47	1	1	0	0	3.08	1.69	1.06	0.3	56	1.59434	1.21583	3.53333	52.8302	89.283	0.242823	2.01606	0.025	5.75	29.4	12.5	1.07	2	290.7	0.01	26.22	21.68	1.13	0.81	111	19.1858	4.77533	1.39506	98.2301	2129.63	OS	69.32	16.87	12.45
0	51	0	1	0	1	1.66	0.73	0.68	0.16	20	1.07353	0.784946	4.25	29.4118	21.4706	0.397753	8.15068	0.037	4.41	31.5	13.6	1.17	1.36	0.21	0.02	11.3	8.54	1.88	0.82	36	4.54255	3.0942	2.29268	19.1489	163.532	OS	47.99	10.11	10.19
0	52	0	1	0	0	2.44	1.53	0.6	0.25	58	2.55	1.68132	2.4	96.6667	147.9	0.0871535	1.41988	0.076	11.95	31.6	13.2	1.13	2.1	321.2	0.44	14.39	12.89	0.62	0.86	75	20.7903	8.59333	0.72093	120.968	1559.27	OS	52.11	12.39	13.67
0	44	1	2	0	0	4.67	3.54	0.67	0.39	51	5.28358	3.13274	1.71795	76.1194	269.463	0.0517697	0.760773	0.067	12.34	37.8	14	1.15	2.09	213.8	0.36	15	13.95	0.56	0.47	60	24.9107	13.2857	1.19149	107.143	1494.64	OS	74.56	20	18.91
0	51	1	1	0	0	3.23	1.95	0.83	0.3	27	2.3494	1.52344	2.76667	32.5301	63.4337	0.164739	3.23172	0.01	2.48	39.5	14.3	1.23	2.69	304.9	0.57	11.4	10.45	0.86	0.09	59	12.1512	11	9.55556	68.6047	716.919	OS	54.12	11.1	8.94
0	58	0	2	0	1	1.45	1.2	0.5	0.3	34	2.4	4.8	1.66667	68	81.6	0.295343	2.94118	1.77	69.25	22.1	14.5	1.25	1.64	67	1.12	25.24	24.1	0.86	0.28	52	28.0233	21.1404	3.07143	60.4651	1457.21	OS+PVD	79	18.56	15.43
0	47	0	1	0	0	2.45	1.58	0.51	0.3	42	3.09804	1.81609	1.7	82.3529	130.118	0.197975	1.69078	0.01	1.38	32.4	13.2	1.13	1.62	279.1	0.45	26.07	25.76	0.18	0.13	59	143.111	83.0968	1.38462	327.778	8443.56	OS	67.81	16.54	14.34
0	64	0	1	0	0	1.98	0.86	0.87	0.33	34	0.988506	0.767857	2.63636	39.0805	33.6092	0.678386	7.28967	0.1	32.56	24.7	13.7	1.15	1.9	221.9	0.98	25.1	22.8	1.54	1.47	66	14.8052	9.91304	1.04762	42.8571	977.143	OS	45.24	13	12
1	26	1	2	0	0	1.55	0.67	0.69	0.14	58	0.971014	0.761364	4.92857	84.058	56.3188	0.202774	6.56974	0.013	6.61	32	13.8	1.19	2.1	231.7	1.45	13.96	11.42	0.65	0.89	108	17.5692	4.49606	0.730337	166.154	1897.48	OS+PVD	69.11	18.96	15.41
0	40	1	2	0	0	3.32	1.97	0.85	9.9	37	2.31765	1.45926	0.0858586	43.5294	85.7529	0.105769	4.43133	0.088	11.11	34.5	15.3	1.32	1.5	197.6	0.77	10.78	9.07	0.61	0.77	78	14.8689	5.30409	0.792208	127.869	1159.77	OS+PVD	33.11	8.54	7.21
0	62	0	1	0	1	1.46	0.91	0.46	0.09	27	1.97826	1.65455	5.11111	58.6957	53.413	0.162882	2.15303	0.097	17.99	32.9	15	1.46	1.66	300.1	0.32	12.7	8.7	1.45	1.23	115	6	2.175	1.17886	79.3103	690	OS+PVD	57	12.43	11
0	44	0	1	0	1	4.53	2.83	1	0.47	94	2.83	1.66471	2.12766	94	266.02	0.0411999	0.729268	0.004	3.25	37.4	14.19	1.21	2.4	138.8	13.86	13.43	10.96	1.3	0.85	123	8.43077	4.43725	1.52941	94.6154	1036.98	OS	34.56	6.8	7.23
0	70	0	1	0	0	7.29	5.52	1.35	0.34	58	4.08889	3.11864	3.97059	42.963	237.156	0.0496299	0.674663	0.01	3.96	43	19.4	1.69	4.26	289.5	0.57	14.59	11.77	1.85	0.9	198	6.36216	4.17376	2.05556	107.027	1259.71	OS	73.12	17	15.45
0	60	0	1	0	0	8.15	6.27	1.18	0.65	99	5.31356	3.33511	1.81538	83.8983	526.042	0.0194471	0.551286	0.187	41.05	31.3	11.3	0.96	2.31	99	1.19	11.73	10.23	1.09	0.34	98	9.38532	6.82	3.20588	89.9083	919.761	LS	36.89	12.45	11.01
0	52	0	1	0	0	5.47	4.4	0.64	0.35	38	6.875	4.11215	1.82857	59.375	261.25	0.0391962	1.07177	0.134	23.11	48	15.5	1.34	2.14	149.7	2.17	11.33	10.24	0.48	0.61	79	21.3333	9.3945	0.786885	164.583	1685.33	OS+PVD	38	10.45	9.2
0	57	0	2	0	1	8.93	7.05	0.93	9.3	139	7.58065	3.75	0.1	149.462	1053.71	0.0144822	0.0854125	0.199	11.43	34.3	13.4	1.2	4.78	155.1	4.86	18.38	15.26	2.28	0.81	236	6.69298	4.89103	2.81481	103.509	1579.54	OS	56	13	11
1	51	1	1	0	0	1.76	1.09	0.46	0.16	27	2.36957	1.62687	2.875	58.6957	63.9783	0.111131	3.28236	0.26	278.1	37.9	14.1	1.14	3.1	132.9	2.16	8.29	7.11	0.36	0.38	82	19.75	6.02542	0.947368	227.778	1619.5	OS+PVD	77.3	17.1	18
0	64	0	1	0	2	2.54	1.72	0.64	0.26	95	2.6875	2.09756	2.46154	148.438	255.312	0.0422619	0.802938	0.18	33.1	22	11.1	0.95	2.31	143.8	1.19	12	10.79	0.52	0.66	99	20.75	8.91736	0.787879	190.385	2054.25	OS	68.2	15.1	14.78
1	49	1	1	0	0	2.66	1.42	0.87	0.3	23	1.63218	1.14516	2.9	26.4368	37.5402	0.694189	7.99143	0.15	12.3	31.5	18.5	1.61	5.97	127.4	1.2	28.57	26.06	0.95	1.63	91	27.4316	10.3825	0.582822	95.7895	2496.27	OS+PVD	67.6	18.1	15.7
0	43	0	2	0	0	1.96	1.49	0.32	0.14	40	4.65625	3.17021	2.28571	125	186.25	0.0500403	1.66443	0.11	0.77	33.6	15.8	1.37	1.34	143.4	1.78	9.92	9.32	0.35	0.25	140	26.6286	15.5333	1.4	400	3728	OS	75.4	15.9	14.8
0	49	0	1	1	2	6.87	5.13	0.59	0.25	21	8.69492	2.94828	2.36	35.5932	182.593	0.0576692	1.58823	0.09	44.3	44	13.7	1.23	2.77	177	1.56	12.53	10.53	1.32	0.56	42	7.97727	5.265	2.35714	31.8182	335.045	OS	46.1	12.3	11.4
0	58	0	1	1	0	4.75	4.04	0.51	0.16	44	7.92157	5.69014	3.1875	86.2745	348.549	0.0460194	0.918092	0.01	68.9	29	13.6	1.17	1.95	350	0.13	16.6	16.04	0.17	0.25	16	94.3529	28.6429	0.68	94.1176	1509.65	OS	57.9	14.9	12
0	53	0	1	0	0	2.02	1.01	0.74	0.21	50	1.36486	1	3.52381	67.5676	68.2432	0.195917	2.05149	0.023	32.1	37.5	14.2	1.22	2	48	3.24	15.67	13.37	0.86	1.43	55	15.5465	5.81304	0.601399	63.9535	855.058	OS	81	16.7	15.4
0	51	0	1	0	0	2.6	1.87	0.44	0.2	21	4.25	2.56164	2.2	47.7273	89.25	0.0540056	1.34454	0.26	11.4	38.3	13.1	1.12	1.87	77	2.78	5.96	4.82	0.59	0.5	50	8.16949	4.22807	1.18	84.7458	408.475	OS	56.1	14.9	12.4
0	46	1	1	0	2	3.31	2.6	0.46	0.25	30	5.65217	3.66197	1.84	65.2174	169.565	0.0427564	1.03205	0.33	0.48	43.9	11.9	1.77	2.67	58	1.67	8.76	7.25	0.43	0.65	44	16.8605	4.80132	0.661538	102.326	741.86	OS+PVD	44.8	14.3	13.9
0	67	0	1	0	2	8.89	7.89	0.52	0.36	106	15.1731	7.89	1.44444	203.846	1608.35	0.0065844	0.0733673	0.218	13.78	29.8	13.1	1.12	1.5	198	0.57	11.51	10.59	0.51	0.38	98	20.7647	11.5109	1.34211	192.157	2034.94	OS	39.7	14.7	13
0	47	1	1	0	1	2.12	0.67	0.54	0.22	54	1.24074	0.462069	2.45455	100	67	0.081791	3.35821	0.012	4.77	27.8	12.5	0.78	1.5	240	0.03	8.77	5.48	0.34	0.21	56	16.1176	1.66565	1.61905	164.706	902.588	OS	48.1	17.11	16
0	50	0	2	0	0	1.56	0.44	0.21	0.17	17	2.09524	0.392857	1.23529	80.9524	35.619	0.249866	4.3516	0.014	5.66	43.8	14.3	1.18	4.77	58	2.37	13.8	8.9	1.28	0.31	67	6.95312	1.81633	4.12903	52.3438	465.859	OS	52.1	14.4	11
0	45	1	1	0	0	3.33	1.28	0.5	1.78	34	2.56	0.62439	0.280899	68	87.04	0.0854779	3.21691	0.022	9.17	32	13.9	2.11	4.8	66	1.18	10.45	7.44	0.89	0.44	103	8.35955	2.47176	2.02273	115.73	861.034	OS	70.1	17.1	13.9
0	48	1	2	0	0	5.49	4.73	0.39	0.28	42	12.1282	6.22368	1.39286	107.692	509.385	0.0246376	0.657656	0.027	17.19	32.4	18	1.67	1.6	81.2	0.73	14.68	12.55	0.79	0.01	51	15.8861	5.89202	79	64.557	810.19	OS+PVD	46.1	12	11
1	48	0	2	0	0	3.25	2.27	0.8	0.14	70	2.8375	2.31633	5.71429	87.5	198.625	0.0415859	1.18313	0.04	1.5	37.6	14.3	1.13	2.41	75.3	0.94	9.45	8.26	0.51	0.18	71	16.1961	6.94118	2.83333	139.216	1149.92	OS	67.92	11.78	8.28
1	60	0	2	0	1	4.06	2.9	0.7	0.28	28	4.14286	2.5	2.5	40	116	0.15069	2.87931	0.02	3.59	41.6	18.3	1.57	1.34	99.57	3.33	19.31	17.48	0.79	0.98	65	22.1266	9.55191	0.806122	82.2785	1438.23	OS+PVD	67.3	16.59	13.3
1	66	0	2	0	1	3.35	1.17	0.7	1.45	59	1.67143	0.536697	0.482759	84.2857	98.6143	0.0489787	3.70129	0.074	9.42	45.3	15	1.2	1.73	80.1	2.99	6.35	4.83	0.32	1.07	77	15.0938	3.17763	0.299065	240.625	1162.22	LS	80.27	13.49	12.28
0	53	1	1	0	0	7.61	5.97	1.01	0.48	150	5.91089	3.64024	2.10417	148.515	886.634	0.0314109	0.524456	0.12	4.56	36.5	15	1.2	2.47	80.77	1.14	29.63	27.85	0.27	1.45	162	103.148	15.6461	0.186207	600	16710	OS+PVD	96.03	17.51	13.58
0	39	0	1	0	0	2.24	1.51	0.45	0.23	52	3.35556	2.06849	1.95652	115.556	174.489	0.0255031	1.63334	0.04	3.08	38	14.4	1.14	1.87	79.44	1.56	5.24	4.45	0.55	0.21	69	8.09091	5.63291	2.61905	125.455	558.273	LS	47.79	16	11.34
0	53	0	2	0	0	1.59	1.13	0.36	0.07	17	3.13889	2.45652	5.14286	47.2222	53.3611	0.136429	7.64602	0.012	1.45	37.5	13.8	1.08	1.94	104.2	0.2	8.45	7.28	0.56	0.61	40	13	6.22222	0.918033	71.4286	520	LS	72.93	16.19	14.34
1	47	1	2	1	0	1.44	0.76	0.52	0.15	20	1.46154	1.11765	3.46667	38.4615	29.2308	0.220658	14.3684	0.081	1,23	37.6	15.8	1.29	1.71	96.2	0.1	7.91	6.45	0.36	0.65	45	17.9167	4.41781	0.553846	125	806.25	OS+PVD	67.65	17.86	16.29
1	60	1	1	0	1	4.06	2.9	0.7	0.28	28	4.14286	2.5	2.5	40	116	0.15069	4.39655	0.1	1.44	41.6	19.8	1.57	1.34	140	2.91	22.3	17.48	0.79	0.98	65	22.1266	3.62656	0.806122	82.2785	1438.23	OS+PVD	66.74	20.06	14.84
0	52	1	1	0	3	5.58	4.08	0.93	0.41	114	4.3871	2.72	2.26829	122.581	500.129	0.0556856	0.879773	0.12	1.22	36.5	15	1.2	2.47	247.1	0.06	34.79	27.85	0.27	1.45	162	103.148	4.01297	0.186207	600	16710	OS+PVD	78.01	18.25	14.76
codebook
outcome	0= No PVT	1=PVT
Sex	0= woman	1=man
BMI	0=＜18.5	1=18.5-24.9	2=＞25
ASA	0=II	1=III
Child-pugh	0=A	1=B
HV	0=hepatitis B	1=hepatitis C	2=alcoholic hepatitis	3=autoimmune hepatitis
